# Supplementary material
Source: PubMed Central journal article supplement (PMC6824909)

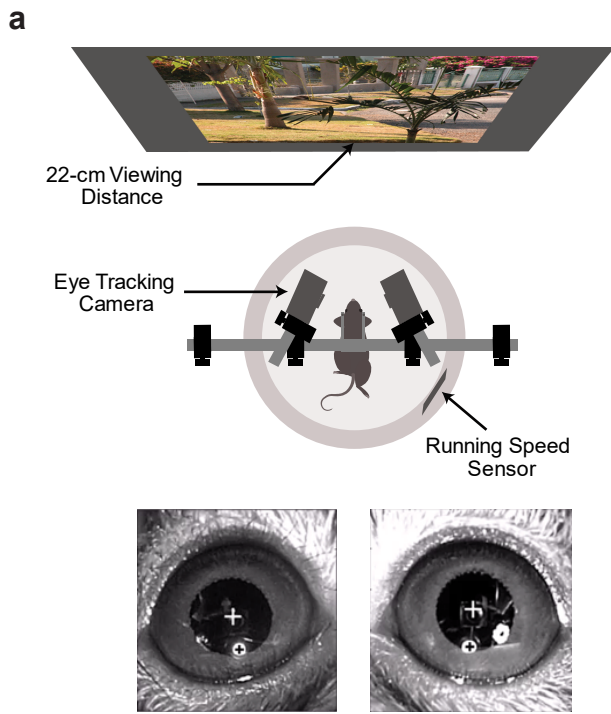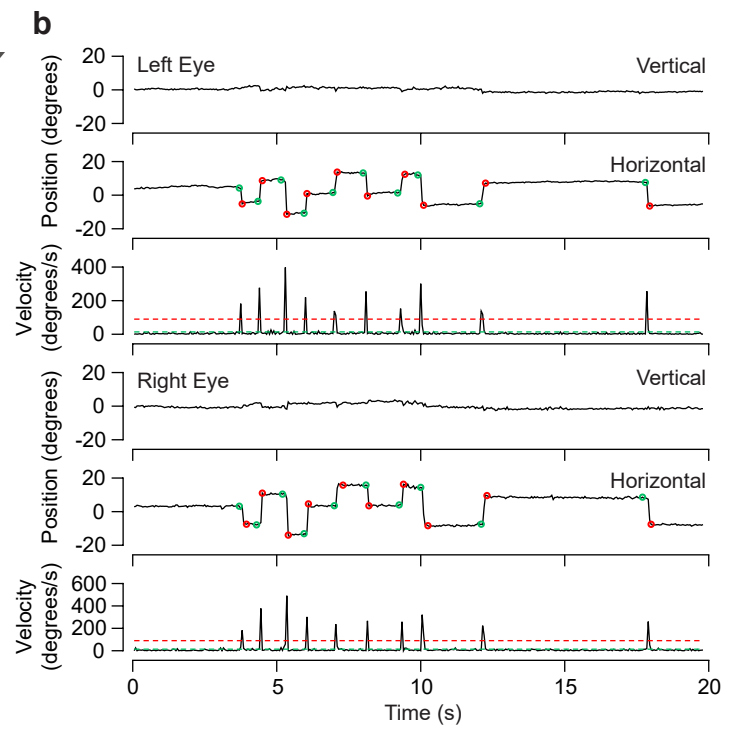

Fig. S1

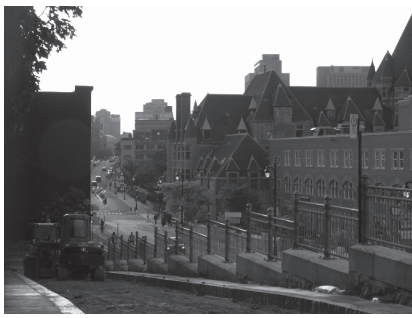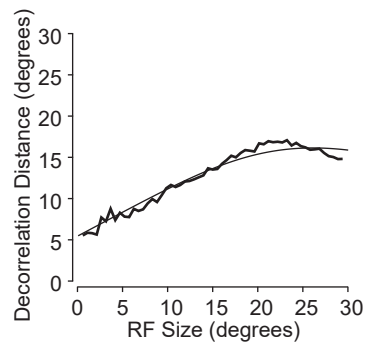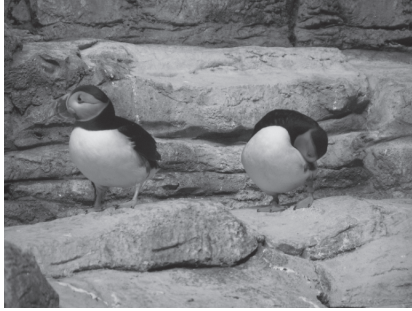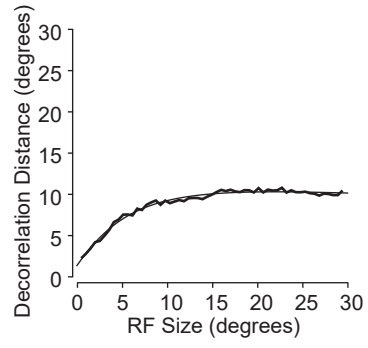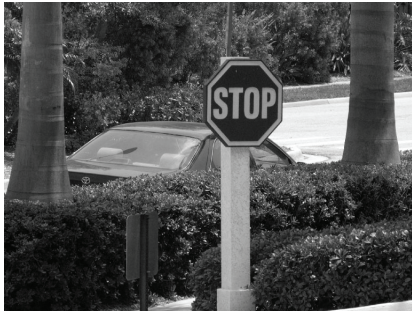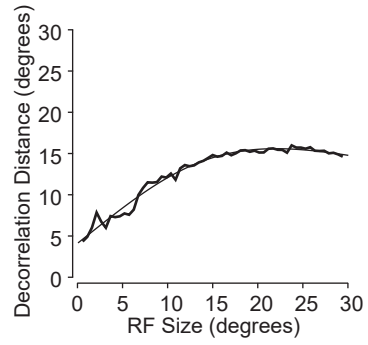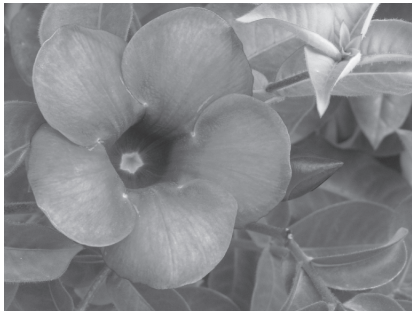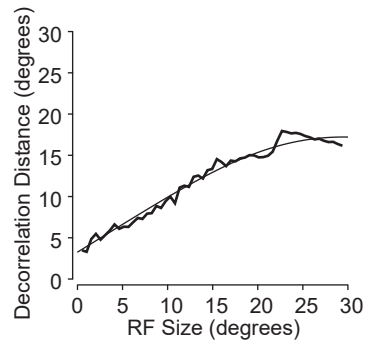

Fig. S2

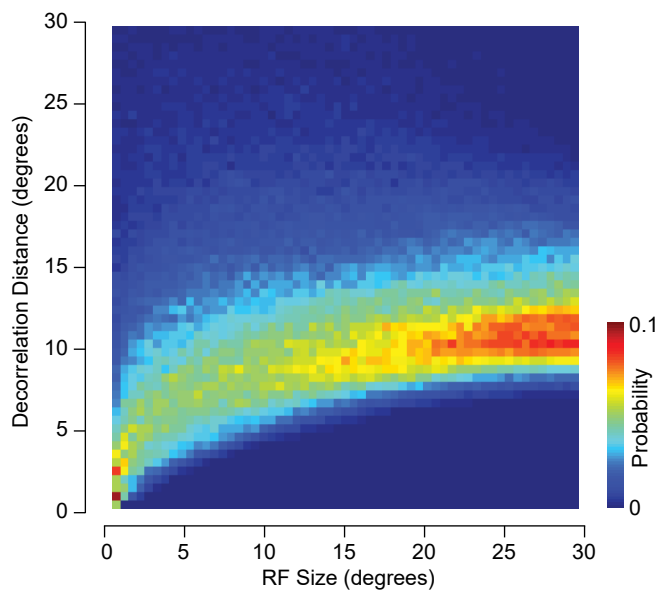

Fig. S3

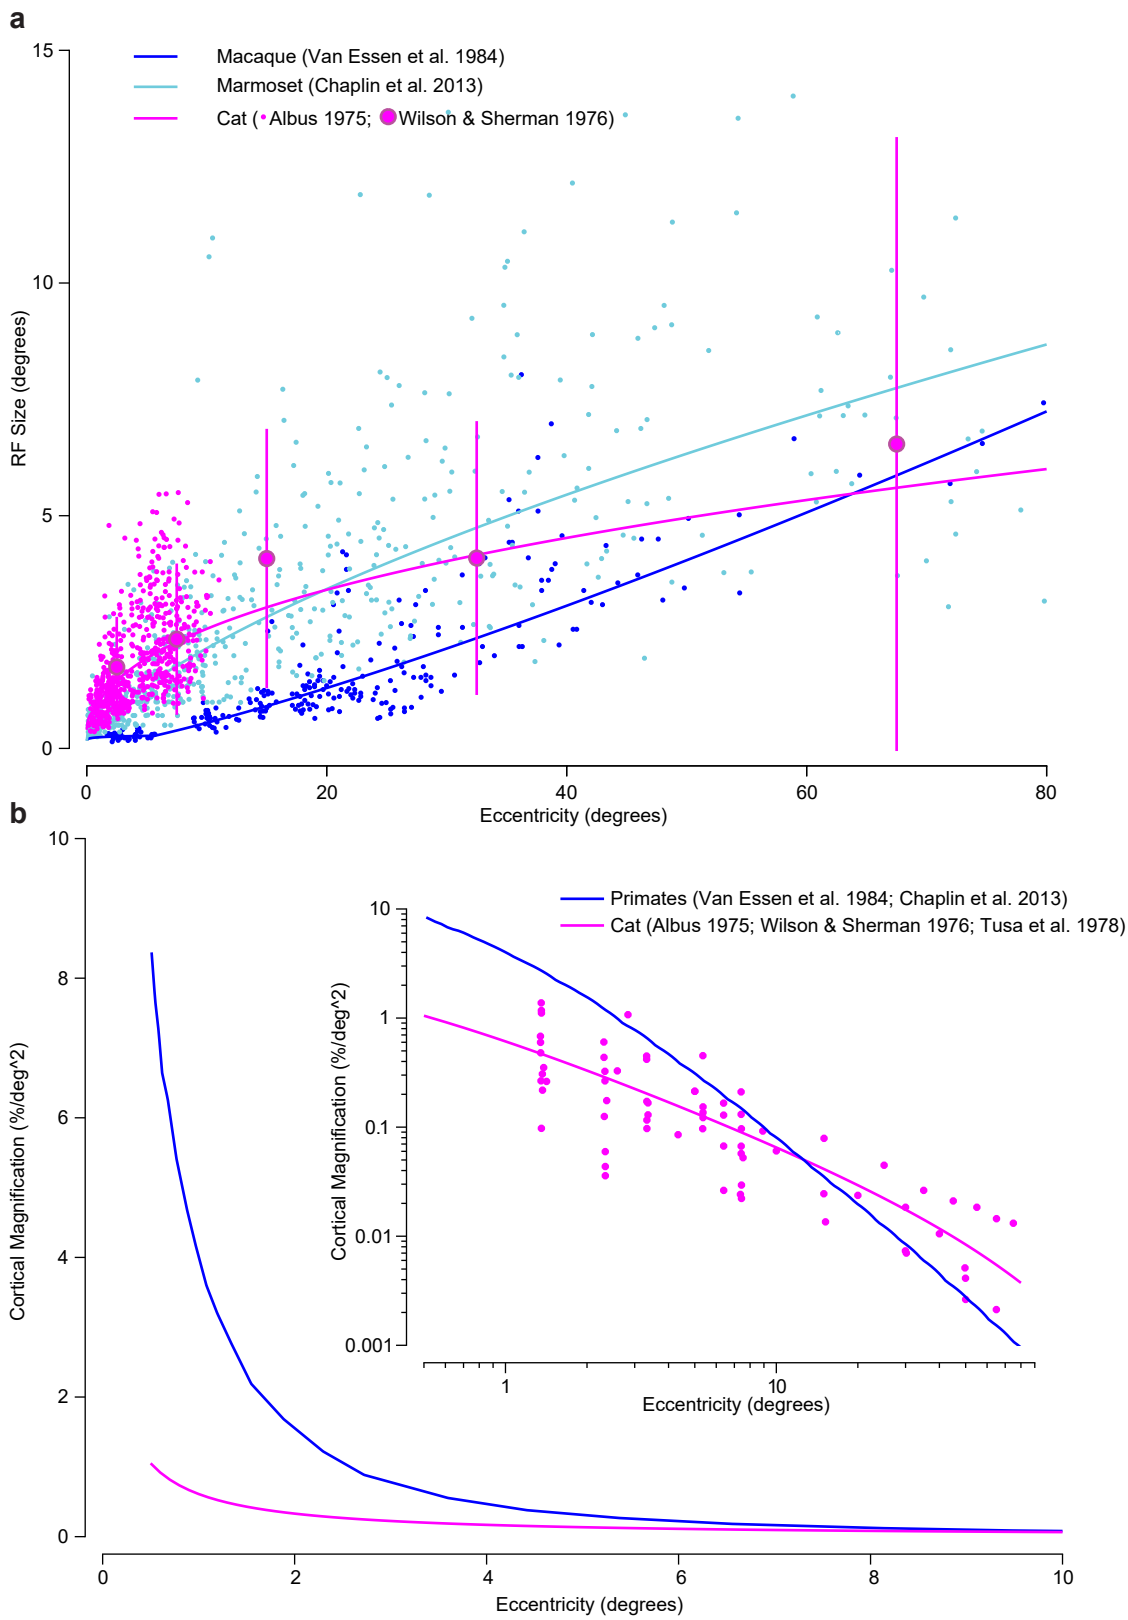

Fig. S4

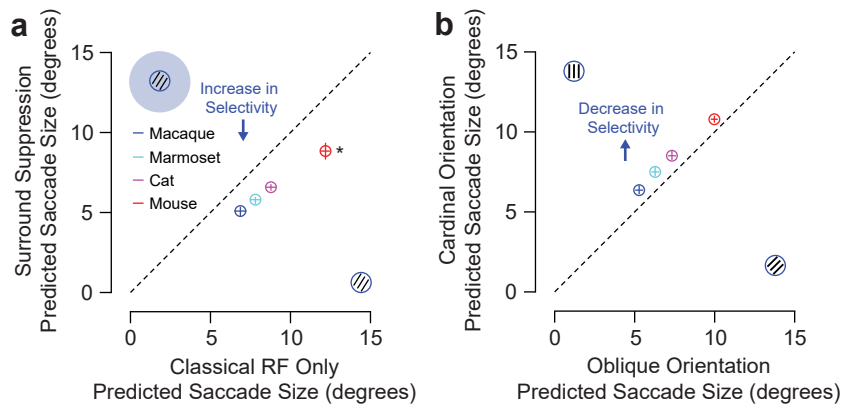

Fig. S5

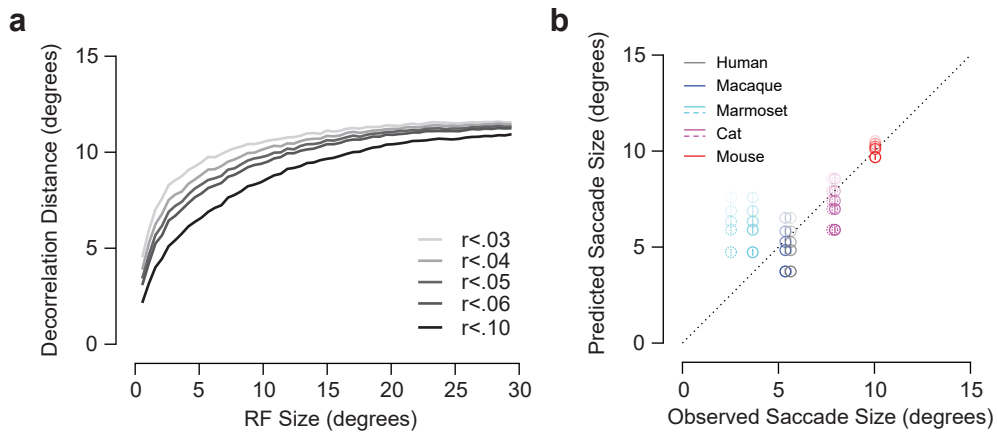

Fig. S6

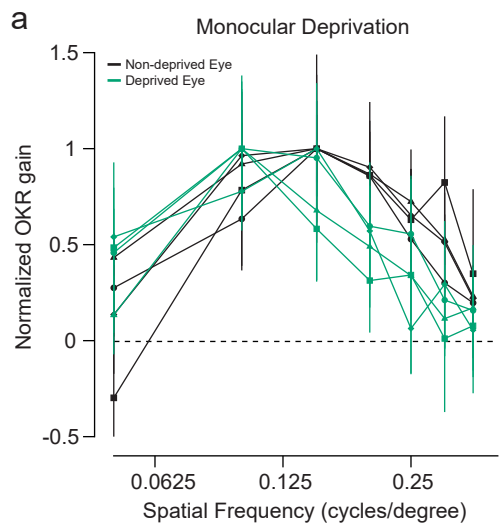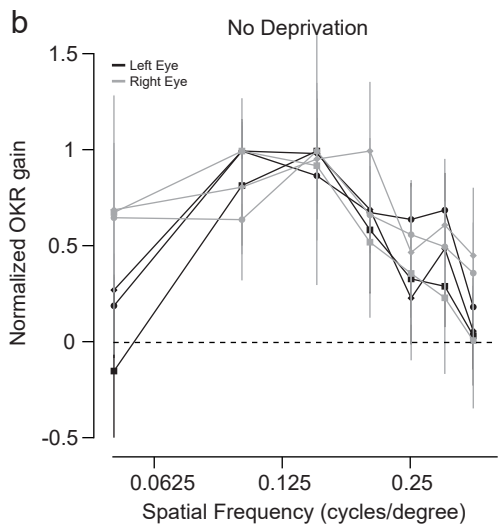

Fig. S7

Supplement: NIHMS1054787-supplement-supplemental_figures.pdf [file NIHMS1054787-supplement-supplemental_figures.pdf]
